# Supplementary material for: Biobased bismaleimide resins with high renewable carbon content, heat resistance and flame retardancy via a multi-functional phosphate from clove oil
Source: Royal Society of Chemistry journal article supplement (doi:10.1039/c8qm00443a), 2018-10-22
Supplement: c8qm00443a1.pdf [file c8qm00443a1.pdf]

## Supplementary Information

### **Biobased bismaleimide resins with high renewable carbon content, heat resistance and flame retardancy *via* a multi-functional phosphate from clove oil**

Jia-Tao Miao, Li Yuan, Guozheng Liang\* and Aijuan Gu\*

State and Local Joint Engineering Laboratory for Novel Functional Polymeric Materials  
Jiangsu Key Laboratory of Advanced Functional Polymer Design and Application  
College of Chemistry, Chemical Engineering and Materials Science  
Soochow University, 199 Ren'ai Road, Suzhou, 215123, China

---

\* Corresponding author. Tel: +86 512 65880967. Fax: +86 512 65880089. E-mail address:  
[lgzheng@suda.edu.cn](mailto:lgzheng@suda.edu.cn) (Guozheng Liang), or, [ajgu@suda.edu.cn](mailto:ajgu@suda.edu.cn) (Aijuan Gu).

## Contents

**Fig. S1.** Viscosity-time curves (at 130 °C) of BD and BTP prepolymers.

**Fig. S2.** FTIR spectra of BDM, TAMPP, BTP prepolymer and cured BTP resin.

**Fig. S3.** Digital photos of BTP resins before (a) and after (b) swelling in THF at 25 °C for 24 h.

**Fig. S4.** Loss modulus-temperature plots of BMI resins from DMA tests.

**Table S1** Renewable carbon contents and integrated performances of biobased eugenol derived BMI resins in literatures and this work.

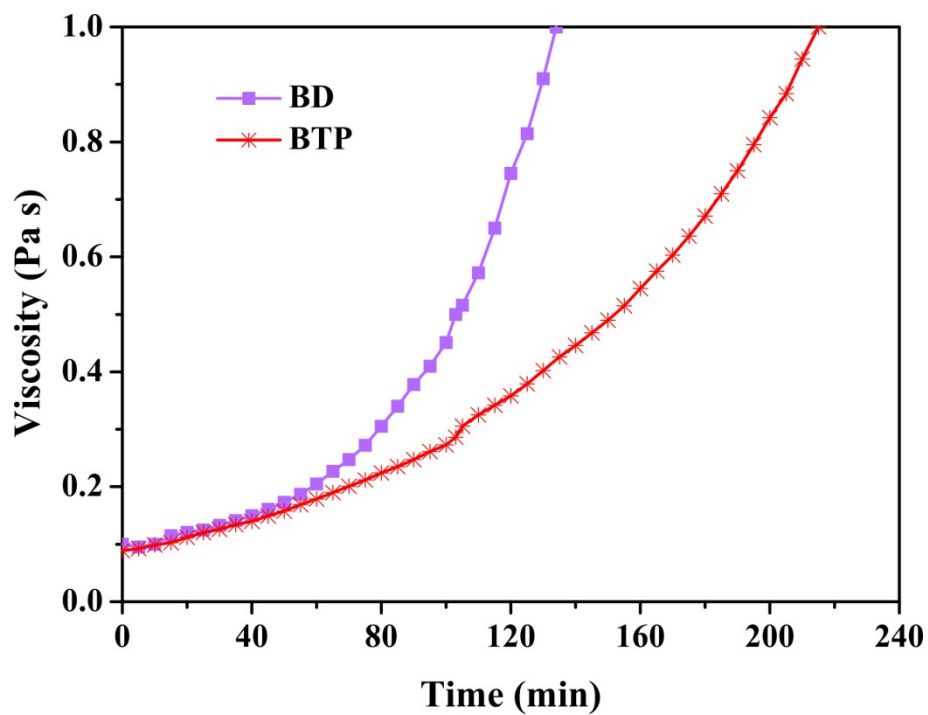

Fig. S1. Viscosity-time curves (at 130 °C) of BD and BTP prepolymers.

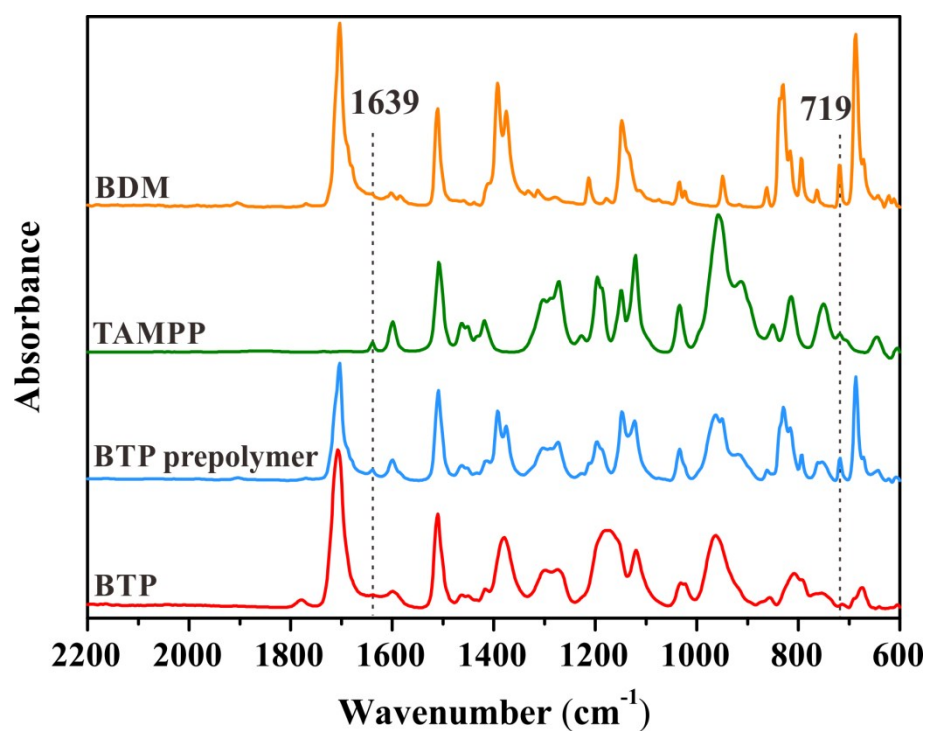

Fig. S2. FTIR spectra of BDM, TAMPP, BTP prepolymer and cured BTP resin.

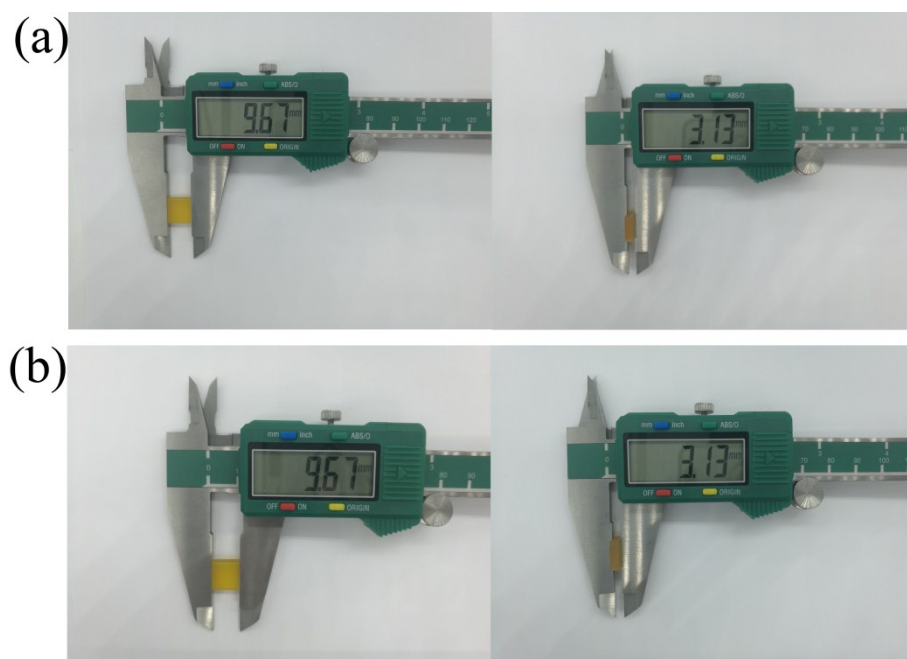

**Fig. S3.** Digital photos of BTP resins before (a) and after (b) swelling in THF at 25 °C for 24 h.

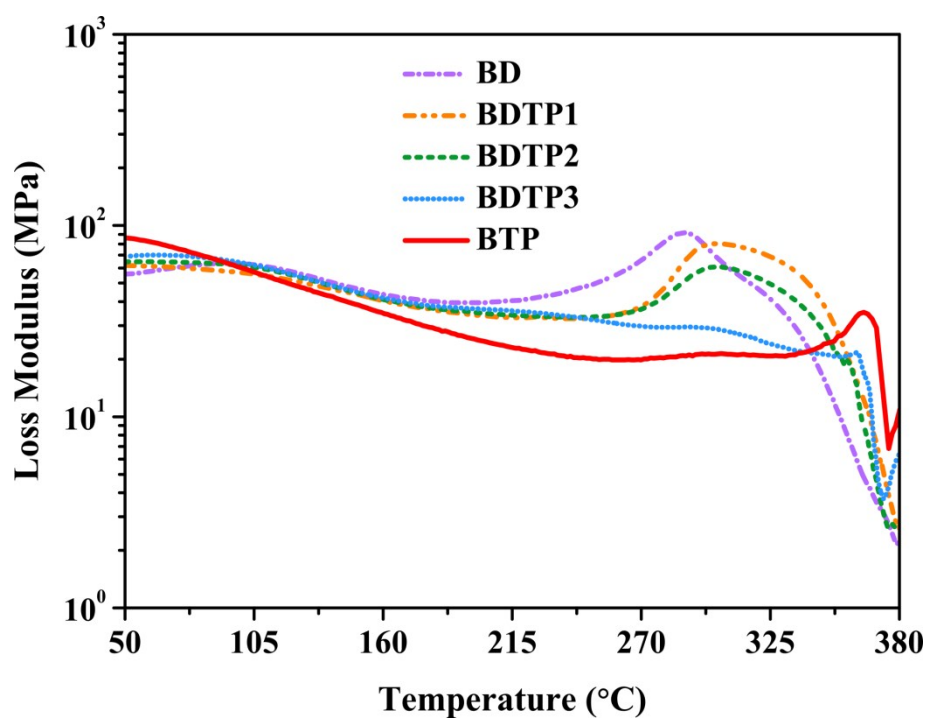

**Fig. S4.** Loss modulus-temperature plots of BMI resins from DMA tests.

**Table S1** Renewable carbon contents and integrated performances of biobased eugenol derived BMI resins in literature and this work.

| BMI resin <sup>a)</sup> | Renewable Carbon Content (%) <sup>b)</sup> | $T_g$ (°C) <sup>c)</sup> | Flexural Strength (MPa) | LOI (%) | UL-94 Level | Decrease degree of PHRR (%) | Decrease degree of THR (%) | Ref       |
|-------------------------|--------------------------------------------|--------------------------|-------------------------|---------|-------------|-----------------------------|----------------------------|-----------|
| BTP                     | 45.0                                       | >380                     | 133.32                  | 39.6    | V-0         | 50.8                        | 72.9                       | This work |
| BMI-HECTP1/1            | 48.8                                       | 256.7                    | 99.09                   | 39      | V-0         | --                          | --                         | [S1]      |
| BMI-HECTP1.5/1          | 38.8                                       | 268.9                    | 100.03                  | 48.4    | V-0         | --                          | --                         |           |
| BMI-HECTP2/1            | 32.3                                       | 273.2                    | 77.77                   | 50.1    | V-0         | --                          | --                         |           |
| BMI-HECTP2.5/1          | 27.6                                       | 272.6                    | 82.32                   | 49.8    | V-0         | --                          | --                         |           |
| BMI-HECTP3/1            | 24.1                                       | 257.6                    | 89.76                   | 48.9    | V-0         | --                          | --                         |           |
| EB11                    | 48.8                                       | 256.4                    | 76                      | --      | --          | --                          | --                         | [S2]      |
| EB12                    | 32.3                                       | 345.8                    | 84.5                    |         |             |                             |                            |           |
| EB13                    | 24.1                                       | 377.0                    | 75                      |         |             |                             |                            |           |
| BB11                    | 48.8                                       | 201.2                    | 14                      |         |             |                             |                            |           |
| BB12                    | 32.3                                       | 285.8                    | 57                      |         |             |                             |                            |           |
| BB13                    | 24.1                                       | 336.1                    | 26                      |         |             |                             |                            |           |
| NB11                    | d)                                         | 319.3                    | 72                      |         |             |                             |                            |           |
| NB12                    |                                            | 343.7                    | 71                      |         |             |                             |                            |           |
| NB13                    |                                            | 365.1                    | 73                      |         |             |                             |                            |           |
| EB'11                   | 29.4                                       | 357.6                    | 59.1                    | --      | --          | --                          | --                         | [S3]      |
| EB'12                   | 18.2                                       | 373.1                    | 58                      |         |             |                             |                            |           |
| EB'13                   | 13.2                                       | >400                     | 49                      |         |             |                             |                            |           |
| BB'11                   | 29.4                                       | 352.8                    | 68.2                    |         |             |                             |                            |           |
| BB'12                   | 18.2                                       | 387.9                    | 59                      |         |             |                             |                            |           |
| BB'13                   | 13.2                                       | >400                     | 47                      |         |             |                             |                            |           |
| p(E-pPDA -bMI)1:1       | 39.2                                       | 265                      | --                      | --      | --          | --                          | --                         | [S4]      |
| p(E-pPDA -bMI)1:0.8     | 42.7                                       | 240                      |                         |         |             |                             |                            |           |
| p(E-pPDA -bMI)1:0.6     | 46.9                                       | 210                      |                         |         |             |                             |                            |           |
| ABM11                   | 29.4                                       | >350                     | 65.8                    | --      | --          | --                          | --                         | [S5]      |
| ABM12                   | 18.2                                       | >350                     | 54.1                    |         |             |                             |                            |           |
| ABM13                   | 13.2                                       | >350                     | 59.4                    |         |             |                             |                            |           |

a) BMI monomer is N,N'-(4,4'-methylenediphenyl) dimaleimide (BDM), BMI resins were obtained by

copolymerizing BDM with allyl compounds.

b) Renewable carbon content (also called biobased content) is assigned as the “amount of biobased carbon in the material or product as a percent of the weight (mass) of the total organic carbon in the product” by the United States Department of Agriculture (USDA).

c)  $T_g$  is determined as the peak of  $\tan \delta$  curve from DMA.

d) The renewable carbon content could not be calculated because the modifier was a blend of two polymers which were derived from both biomass and petrochemical resources.

## References

- [S1] X. Zhang, R. Akram, S. Zhang, H. Ma, Z. Wu and D. Wu, *React. Funct. Polym.*, 2017, **113**, 77-84.
- [S2] M. Shibata, N. Tetramoto, A. Imada, M. Neda and S. Sugimoto, *React. Funct. Polym.*, 2013, **73**, 1086-1095.
- [S3] M. Neda, K. Okinaga and M. Shibata, *Mater. Chem. Phys.*, 2014, **148**, 319-327.
- [S4] L. Dumas, L. Bonnaud, M. Olivier, M. Poorteman and P. Dubois, *Eur. Polym. J.*, 2015, **67**, 494-502.
- [S5] M. Shibata, T. Shimasaki, H. Satoh, M. Iwai and M. Neda, *React. Funct. Polym.*, 2015, **97**, 69-76.
